# Supplementary material
Source: publisher site journal article supplement (https://www.dovepress.com/get_supplementary_file.php?f=491507.docx)
Supplement: Supplementary file 1 [file get_supplementary_file.php]

**Supplementary materials**

Table S1. Risk factors for PI in patients of NSCLC by multiple-factor analysis.

| Risk factors | Values | B | SE | Wald | P | OR | 95%CI |
| --- | --- | --- | --- | --- | --- | --- | --- |
| Chemotherapy cycles ≥ 4 | 0=cycles＜4,  1=cycles ≥ 4 | 0.707 | 0.339 | 4.340 | 0.037 | 2.027 | （1.043,3.941） |
| Radiotherapy | 0=No,1=Yes | 1.277 | 0.431 | 8.767 | 0.003 | 3.585 | （1.540,8.349） |
| Neutrophil count | continuous variable | 0.250 | 0.091 | 7.631 | 0.006 | 1.285 | （1.075,1.534） |
| Constant | -- | -3.453 | 0.786 | 19.307 | ＜0.001 | 0.032 | -- |
